# Supplementary material for: Developing an FexCoyLaz-based amorphous aerogel catalyst for the oxygen evolution reaction via high throughput synthesis
Source: Royal Society of Chemistry journal article supplement (doi:10.1039/d3ta06211b), 2023-12-07
Supplement: d3ta06211b2.pdf [file d3ta06211b2.pdf]

## Supplementary Information

### **Developing Fe<sub>x</sub>Co<sub>y</sub>La<sub>z</sub>-based amorphous aerogel catalyst for oxygen evolution reaction via high throughput synthesis**

*Bijun Cai<sup>#,1</sup>, Shaomeng Xu<sup>#,1,3</sup>, Zhuyang Chen<sup>\*,1</sup>, Weixuan Li<sup>1</sup>, Ronggui Zhu<sup>1,2</sup>, Shibo Xi<sup>4</sup>, Chen Xu<sup>\*,2</sup>, and X.-D. Xiang<sup>\*,1,2</sup>*

1. School of Materials Science and Engineering,

Southern University of Science and Technology, 1088 Xueyuan Avenue, Shenzhen 518055, P.R. China

2. Academy for Advanced Interdisciplinary Studies,

Southern University of Science and Technology, 1088 Xueyuan Avenue, Shenzhen 518055, P.R. China

3. School of Materials Science and Engineering, Harbin Institute of Technology, Harbin 150001, P.R. China

4. Institute of Chemical and Engineering Sciences, A\*STAR (Agency for Science, Technology and Research), 1 Pesek Road, Jurong Island, Singapore 627833, Singapore

E-mail: xuc3@sustech.edu.cn, chenzy3@sustech.edu.cn, xiangxd@sustech.edu.cn

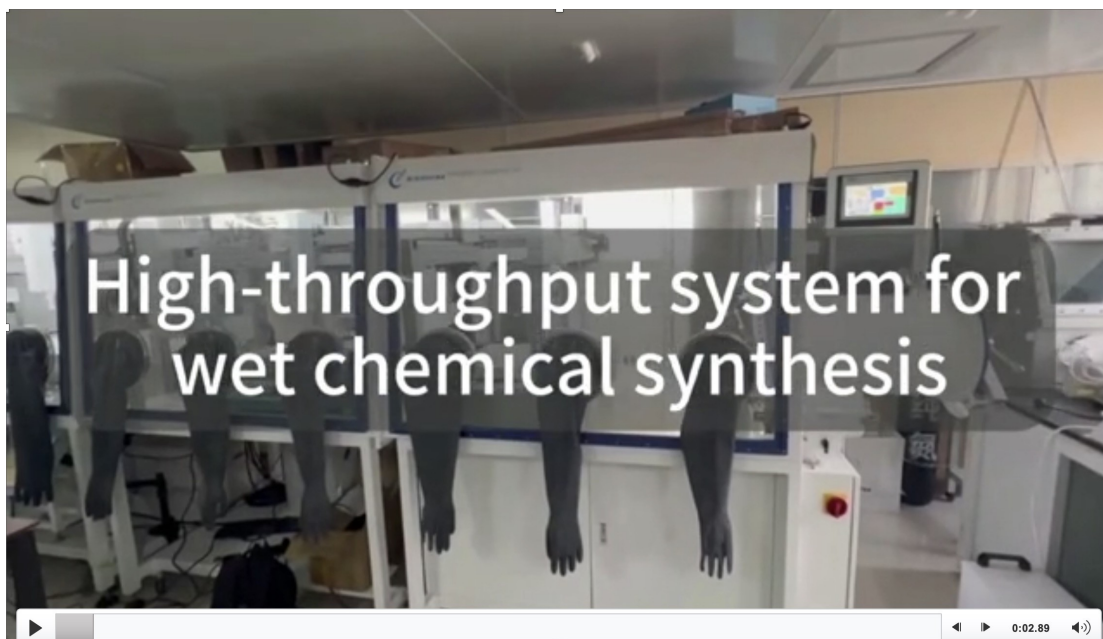

**Video S1. (Supplementary Video 1)** High throughput fabrication for amorphous aerogel catalyst.

| Preset Ratio |    |    | The mass fraction of each element in the aerogel |          |          |            | Actual Element Ratio |         |         |            |     |     |
|--------------|----|----|--------------------------------------------------|----------|----------|------------|----------------------|---------|---------|------------|-----|-----|
| Fe           | Co | La | Fe (wt%)                                         | Co (wt%) | La (wt%) | Total(wt%) | Fe(at%)              | Co(at%) | La(at%) | Atom Ratio |     |     |
| 2            | 3  | 3  | 8.6                                              | 13.2     | 29.7     | 51.4       | 25.8                 | 37.6    | 36.6    | 2.2        | 3.1 | 3.1 |
| 2            | 4  | 2  | 10.1                                             | 24.0     | 26.4     | 60.4       | 23.2                 | 52.1    | 24.7    | 1.9        | 4.2 | 2.0 |
| 3            | 3  | 2  | 8.6                                              | 5.6      | 16.6     | 30.8       | 40.5                 | 27.0    | 32.4    | 3          | 2   | 2.4 |
| 3            | 2  | 3  | 10.5                                             | 8.2      | 30.1     | 48.8       | 34.4                 | 25.4    | 40.2    | 2.9        | 2.1 | 3.4 |
| 4            | 2  | 2  | 7.0                                              | 3.7      | 7.0      | 17.6       | 51.9                 | 26.0    | 22.1    | 4          | 2   | 1.7 |
| 2            | 1  | 5  | 4.5                                              | 2.3      | 28.2     | 35.0       | 25.0                 | 12.5    | 62.5    | 2          | 1   | 5   |
| 2            | 5  | 1  | 11.5                                             | 30.7     | 14.6     | 56.7       | 24.7                 | 62.5    | 12.8    | 2.1        | 5.2 | 1.1 |
| 3            | 1  | 4  | 6.7                                              | 2.7      | 20.4     | 29.7       | 38.0                 | 15.2    | 46.8    | 3          | 1.2 | 3.7 |
| 3            | 4  | 1  | 9.8                                              | 13.2     | 8.4      | 31.4       | 39.0                 | 48.1    | 13.0    | 3          | 3.7 | 1   |
| 1            | 5  | 2  | 3.1                                              | 17.7     | 17.1     | 37.8       | 11.4                 | 62.6    | 26.0    | 0.8        | 4.8 | 2   |
| 1            | 6  | 1  | 4.6                                              | 28.1     | 9.6      | 42.3       | 13.1                 | 75.7    | 11.2    | 1          | 5.8 | 0.9 |
| 4            | 1  | 3  | 9.8                                              | 3.0      | 19.7     | 32.4       | 47.3                 | 13.7    | 39.0    | 3.63       | 1.1 | 3   |
| 5            | 1  | 2  | 28.6                                             | 7.6      | 28.0     | 64.1       | 60.6                 | 15.2    | 24.2    | 5.0        | 1.3 | 2.0 |
| 5            | 2  | 1  | 17.3                                             | 8.8      | 8.5      | 34.7       | 59.3                 | 28.7    | 12.0    | 5          | 2.4 | 1   |
| 1            | 1  | 6  | 2.6                                              | 2.5      | 33.2     | 38.2       | 14.0                 | 12.6    | 73.4    | 1.1        | 1   | 5.8 |
| 1            | 3  | 4  | 2.6                                              | 8.4      | 28.9     | 40.0       | 11.6                 | 35.6    | 52.7    | 1          | 3   | 4.4 |
| 1            | 4  | 3  | 3.9                                              | 16.5     | 29.2     | 49.6       | 12.4                 | 49.8    | 37.9    | 1.0        | 4.2 | 3.2 |
| 1            | 2  | 5  | 2.2                                              | 5.0      | 27.3     | 34.5       | 12.2                 | 26.2    | 61.6    | 1          | 2.1 | 5   |
| 6            | 1  | 1  | 20.1                                             | 4.2      | 8.9      | 33.2       | 72.5                 | 14.4    | 13.1    | 5.5        | 1.1 | 1   |
| 2            | 3  | 5  | 7.2                                              | 11.6     | 45.0     | 63.7       | 19.6                 | 30.1    | 50.3    | 2.0        | 3.0 | 5.0 |
| 5            | 2  | 3  | 20.0                                             | 8.7      | 29.5     | 58.1       | 49.6                 | 20.4    | 30.0    | 4.9        | 2.0 | 3.0 |
| 2            | 5  | 3  | 8.6                                              | 21.8     | 32.5     | 62.8       | 20.1                 | 48.7    | 31.2    | 2.0        | 4.8 | 3.1 |
| 4            | 1  | 5  | 12.1                                             | 3.9      | 36.7     | 52.6       | 39.4                 | 11.9    | 48.7    | 3.9        | 1.2 | 4.9 |
| 1            | 5  | 4  | 3.7                                              | 17.2     | 33.7     | 54.5       | 10.8                 | 48.4    | 40.8    | 1.1        | 4.8 | 4.1 |
| 1            | 4  | 5  | 3.5                                              | 13.1     | 38.5     | 55.1       | 11.1                 | 39.3    | 49.7    | 1.1        | 3.9 | 5.0 |
| 8            | 0  | 2  | 41.4                                             | 1.4      | 25.0     | 67.8       | 78.2                 | 2.5     | 19.3    | 7.8        | 0.0 | 1.9 |
| 4            | 5  | 1  | 18.7                                             | 28.7     | 13.5     | 60.8       | 36.3                 | 52.9    | 10.7    | 3.6        | 5.3 | 1.1 |
| 2            | 8  | 0  | 18.7                                             | 38.9     | 1.8      | 59.4       | 33.2                 | 65.5    | 1.3     | 2.0        | 4.0 | 0.0 |
| 0            | 8  | 2  | 0.1                                              | 24.2     | 29.6     | 53.9       | 0.3                  | 65.4    | 34.4    | 0.0        | 3.8 | 2.0 |
| 3            | 2  | 5  | 9.4                                              | 6.9      | 49.3     | 65.5       | 26.1                 | 18.0    | 55.9    | 2.9        | 2.0 | 6.2 |
| 3            | 5  | 2  | 14.1                                             | 24.7     | 23.1     | 61.9       | 29.9                 | 49.9    | 20.1    | 3.0        | 5.0 | 2.0 |
| 5            | 3  | 2  | 20.9                                             | 13.5     | 21.0     | 55.4       | 49.4                 | 30.3    | 20.3    | 4.9        | 3.0 | 2.0 |
| 5            | 1  | 4  | 17.6                                             | 4.4      | 32.3     | 54.2       | 50.3                 | 11.8    | 37.8    | 5.0        | 1.2 | 3.8 |
| 5            | 4  | 1  | 22.3                                             | 19.6     | 11.2     | 53.1       | 49.1                 | 40.8    | 10.1    | 4.9        | 4.1 | 1.0 |
| 0            | 2  | 8  | 0.5                                              | 6.9      | 54.7     | 62.0       | 1.5                  | 22.2    | 76.3    | 0.0        | 2.2 | 7.6 |
| 2            | 0  | 8  | 6.4                                              | 0.5      | 51.1     | 58.0       | 23.1                 | 1.7     | 75.2    | 2.0        | 0.0 | 6.0 |
| 8            | 2  | 0  | 41.1                                             | 11.3     | 0.9      | 53.2       | 78.8                 | 20.5    | 0.7     | 7.9        | 2.1 | 0.0 |
| 7            | 1  | 2  | 39.3                                             | 5.3      | 25.8     | 70.4       | 71.7                 | 9.1     | 19.2    | 7.0        | 1.0 | 2.0 |
| 2            | 1  | 7  | 7.0                                              | 3.0      | 48.0     | 58.0       | 23.6                 | 9.7     | 66.7    | 2.3        | 1.0 | 6.6 |

|   |   |   |      |      |      |      |      |      |      |     |     |     |
|---|---|---|------|------|------|------|------|------|------|-----|-----|-----|
| 1 | 7 | 2 | 5.3  | 23.5 | 26.2 | 55.0 | 13.8 | 58.3 | 27.9 | 1.0 | 4.2 | 2.0 |
| 1 | 2 | 7 | 2.7  | 5.9  | 40.2 | 48.8 | 11.1 | 22.6 | 66.4 | 1.0 | 2.0 | 6.6 |
| 2 | 7 | 1 | 10.5 | 35.5 | 13.4 | 59.4 | 21.1 | 67.8 | 11.1 | 2.1 | 6.8 | 1.1 |
| 7 | 2 | 1 | 42.9 | 8.1  | 13.9 | 64.9 | 76.3 | 13.7 | 10.1 | 7.6 | 1.3 | 1.0 |
| 0 | 5 | 5 | 2.1  | 17.8 | 40.8 | 60.6 | 5.8  | 47.5 | 46.7 | 0.0 | 5.0 | 5.0 |
| 5 | 5 | 0 | 38.0 | 24.8 | 1.1  | 63.9 | 61.3 | 37.9 | 0.7  | 6.2 | 3.8 | 0.0 |
| 3 | 3 | 4 | 11.7 | 11.2 | 35.3 | 58.1 | 31.9 | 28.8 | 39.3 | 3.2 | 2.9 | 3.9 |
| 3 | 4 | 3 | 14.9 | 19.1 | 34.6 | 68.7 | 31.6 | 38.4 | 30.0 | 3.2 | 3.8 | 3.0 |
| 4 | 3 | 3 | 15.3 | 10.6 | 27.7 | 53.6 | 41.8 | 27.4 | 30.8 | 4.2 | 2.7 | 3.1 |
| 6 | 3 | 1 | 27.8 | 13.7 | 11.1 | 52.7 | 61.3 | 28.7 | 10.0 | 6.1 | 2.9 | 1.0 |
| 1 | 6 | 3 | 3.8  | 21.4 | 24.5 | 49.7 | 11.3 | 59.4 | 29.3 | 1.1 | 6.0 | 2.9 |
| 3 | 6 | 1 | 15.2 | 30.2 | 13.3 | 58.7 | 30.8 | 58.1 | 11.1 | 3.1 | 5.8 | 1.1 |
| 1 | 3 | 6 | 4.3  | 9.9  | 48.0 | 62.2 | 12.9 | 28.3 | 58.9 | 1.3 | 2.8 | 5.9 |
| 6 | 1 | 3 | 33.7 | 6.6  | 38.4 | 78.7 | 60.5 | 11.3 | 28.2 | 6.0 | 1.1 | 2.9 |
| 3 | 1 | 6 | 12.2 | 4.7  | 53.7 | 70.6 | 31.7 | 11.6 | 56.8 | 3.2 | 1.1 | 5.7 |

**Table S1. (Supplementary Table 1)** Inductively coupled plasma mass spectrometry (ICP-MS)

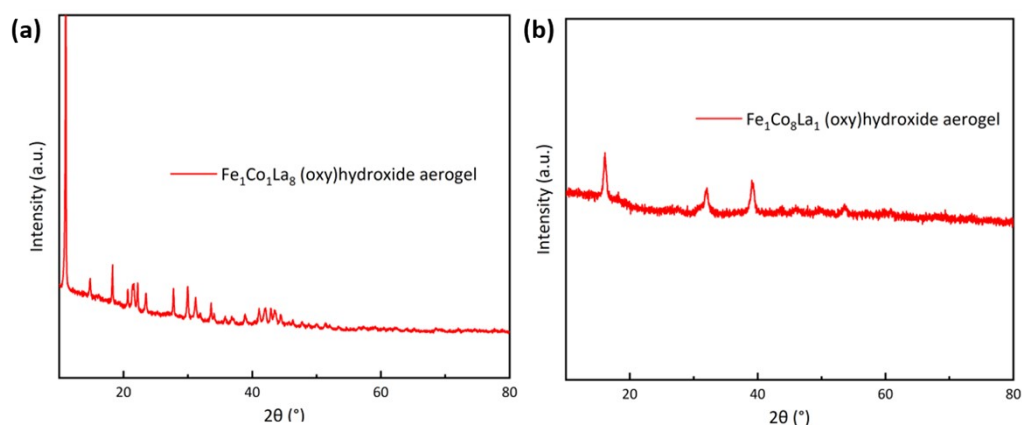

**Figure S1.** XRD pattern of the  $\text{Fe}_x\text{Co}_y\text{La}_z$  (oxy)hydroxide aerogel, diffraction peaks were observed once an element is significantly higher ( $x, y$  or  $z \geq 8$ ) than the other two.

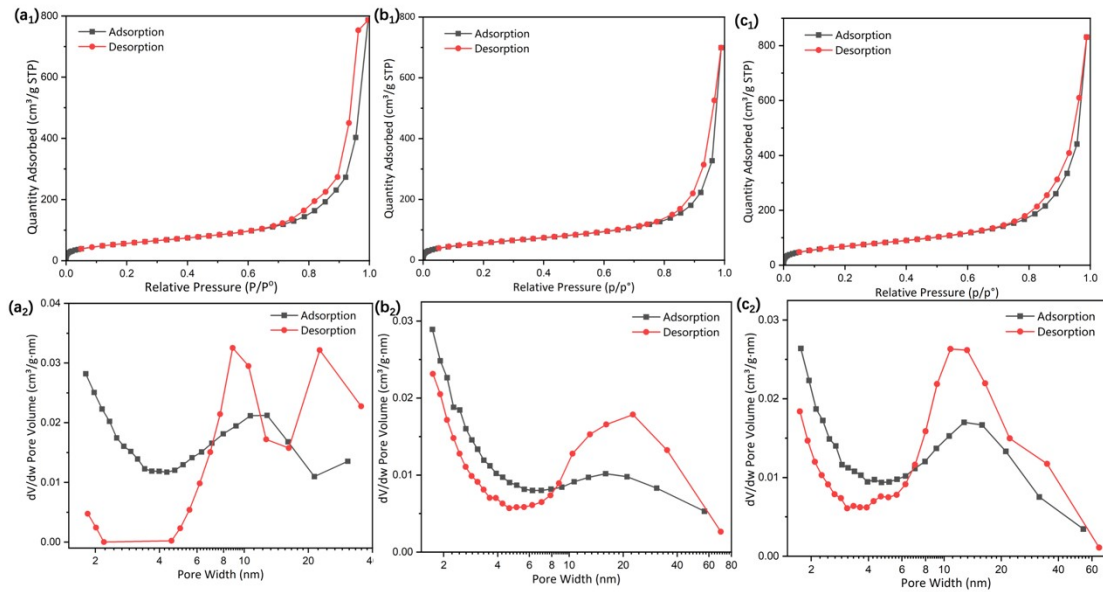

**Figure S2.** Isotherm linear plot of BET characterization results of **(a<sub>1</sub>)** Fe<sub>4</sub>Co<sub>4</sub>La<sub>2</sub> (oxy)hydroxide aerogel, with BET surface area of 207.07 m<sup>2</sup> g<sup>-1</sup>, **(a<sub>2</sub>)** average pore size of ~15 nm; **(b<sub>1</sub>)** Fe<sub>4</sub>Co<sub>6</sub> (oxy)hydroxide aerogel, with a surface area of 251.94 m<sup>2</sup> g<sup>-1</sup>, **(b<sub>2</sub>)** average pore size of ~20 nm; **(c<sub>1</sub>)** Fe<sub>3</sub>Co<sub>3</sub>La<sub>2</sub> (oxy)hydroxide aerogel, with BET surface area of 209.17 m<sup>2</sup> g<sup>-1</sup>, **(c<sub>2</sub>)** average pore size of ~20 nm.

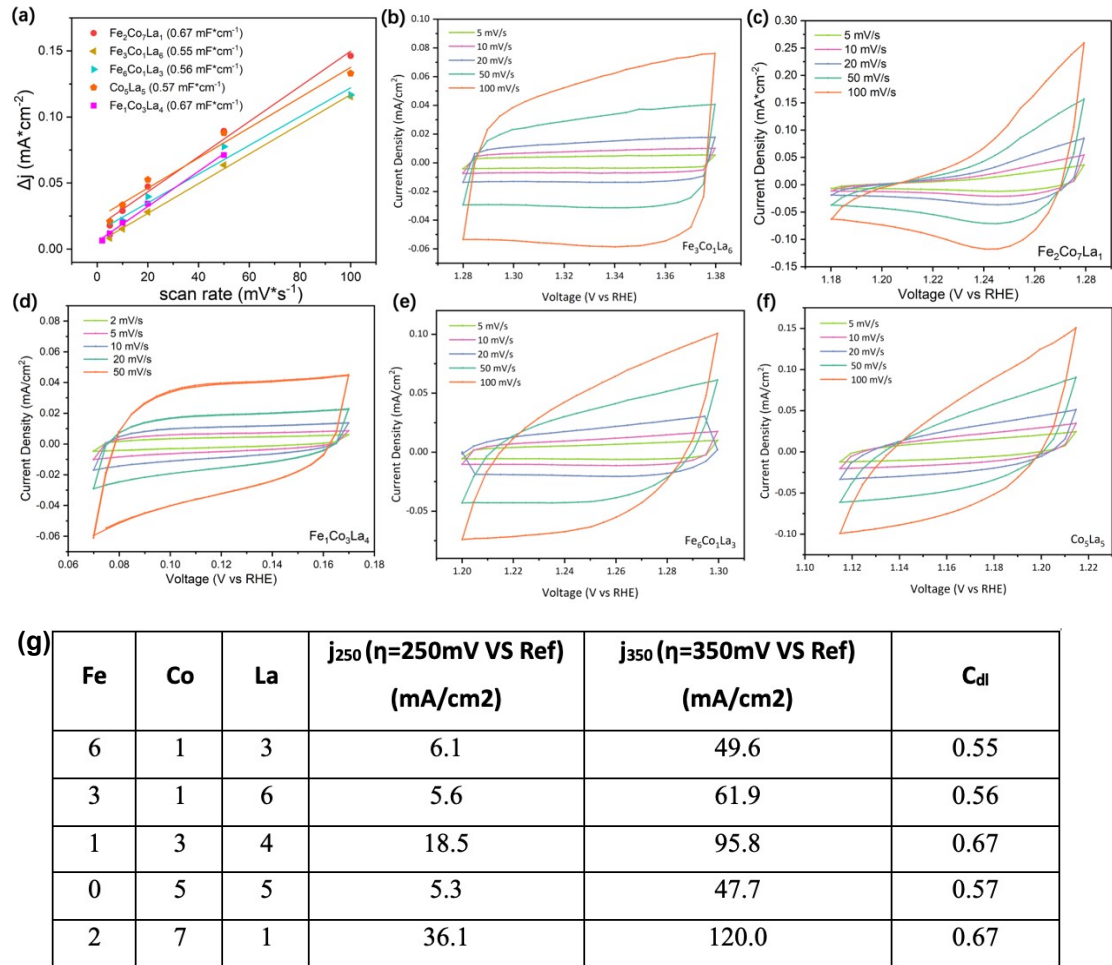

**Figure S3.** (a) The corresponding  $C_{dl}$  derived from different scan rates via CV and (b-f) the electrochemical active surface area (ECSA) of selected samples. (g) A summary of the ECSA analysis of selected samples.

| Element Ratio |    |    | Catalytic Performance      |                  |                   |                                     |
|---------------|----|----|----------------------------|------------------|-------------------|-------------------------------------|
| Fe            | Co | La | $\eta_{\text{onset}}$ (mV) | $\eta_{10}$ (mV) | $\eta_{100}$ (mV) | Tafel Slope (mV dev <sup>-1</sup> ) |
| 2             | 3  | 3  | 216±6                      | 227±6            | 337±6             | 40.03                               |
| 2             | 4  | 2  | 199±8                      | 210±6            | 315±8             | 44.39                               |
| 3             | 3  | 2  | 260±3                      | 290±2            | 460±3             | 48.28                               |
| 3             | 2  | 3  | 221±2                      | 226±3            | 335±3             | 36.49                               |
| 4             | 2  | 2  | 226±5                      | 236±0            | 364±5             | 42.58                               |
| 2             | 1  | 5  | 255±4                      | 270±3            | 400±3             | 40.62                               |
| 2             | 2  | 4  | 233±3                      | 240±3            | 360±6             | 39.77                               |
| 2             | 5  | 1  | 216±5                      | 230±11           | 353±13            | 45.19                               |
| 3             | 1  | 4  | 240±3                      | 280±4            | 460±6             | 41.25                               |
| 3             | 4  | 1  | 220±8                      | 232±6            | 354±11            | 42.92                               |
| 1             | 5  | 2  | 210±6                      | 216±8            | 322±8             | 59.32                               |
| 1             | 6  | 1  | 215±11                     | 219±2            | 331±6             | 50.66                               |
| 4             | 1  | 3  | 244±4                      | 254±5            | 383±3             | 37.6                                |
| 5             | 1  | 2  | 238±5                      | 244±8            | 379±8             | 35.82                               |
| 5             | 2  | 1  | 260±4                      | 290±1            | 420±4             | 46.08                               |
| 1             | 1  | 6  | 285±2                      | 306±3            | 460±2             | 41                                  |
| 1             | 3  | 4  | 219±2                      | 234±4            | 357±3             | 43.67                               |
| 1             | 4  | 3  | 220±8                      | 230±9            | 339±12            | 48.07                               |
| 4             | 2  | 1  | 213±3                      | 220±5            | 334±4             | 41.32                               |
| 1             | 2  | 5  | 249±4                      | 259±2            | 375±9             | 43.27                               |
| 6             | 1  | 1  | 265±10                     | 286±3            | 461±14            | 42.09                               |
| 2             | 3  | 5  | 240±15                     | 250±19           | 430±27            | 45.48                               |
| 5             | 2  | 3  | 226±13                     | 238±14           | 378±18            | 36.14                               |
| 2             | 5  | 3  | 209±5                      | 215±9            | 319±9             | 43.17                               |
| 4             | 1  | 5  | 244±3                      | 252±5            | 380±6             | 35.71                               |
| 1             | 5  | 4  | 226±3                      | 233±5            | 350±3             | 51.75                               |
| 1             | 4  | 5  | 252±3                      | 260±3            | 372±3             | 43.14                               |
| 8             | 0  | 2  | 354±2                      | 386±5            | 692±1             | 41.78                               |
| 4             | 5  | 1  | 207±8                      | 222±9            | 340±8             | 43.1                                |
| 2             | 8  | 0  | 230±3                      | 240±3            | 390±5             | 49.27                               |
| 0             | 8  | 2  | 220±4                      | 250±6            | 430±4             | 57.64                               |
| 3             | 2  | 5  | 231±5                      | 240±5            | 338±11            | 38.18                               |
| 3             | 5  | 2  | 208±5                      | 220±6            | 346±9             | 47.67                               |
| 5             | 3  | 2  | 218±5                      | 229±7            | 345±5             | 38.94                               |
| 5             | 1  | 4  | 244±9                      | 264±9            | 429±12            | 35.95                               |
| 5             | 4  | 1  | 220±8                      | 230±16           | 350±8             | 43.21                               |
| 0             | 2  | 8  | 280±3                      | 340±8            | 630±9             | 56.92                               |
| 2             | 0  | 8  | 335±2                      | 487±5            | 700±5             | 53.82                               |
| 8             | 2  | 0  | 250±5                      | 260±6            | 430±14            | 47.17                               |
| 7             | 1  | 2  | 251±5                      | 260±3            | 395±5             | 37.33                               |

|   |   |   |        |        |        |       |
|---|---|---|--------|--------|--------|-------|
| 2 | 1 | 7 | 249±2  | 255±1  | 366±6  | 36.92 |
| 1 | 7 | 2 | 214±11 | 225±12 | 342±11 | 48.17 |
| 1 | 2 | 7 | 266±3  | 278±3  | 408±3  | 40.14 |
| 2 | 7 | 1 | 202±3  | 208±3  | 327±5  | 54.16 |
| 7 | 2 | 1 | 230±5  | 240±6  | 369±14 | 39.93 |
| 0 | 5 | 5 | 250±6  | 270±3  | 420±9  | 62.66 |
| 5 | 5 | 0 | 202±3  | 213±1  | 338±3  | 49.93 |
| 3 | 3 | 4 | 223±3  | 230±3  | 334±4  | 36.3  |
| 3 | 4 | 3 | 234±11 | 239±6  | 334±5  | 36.3  |
| 1 | 1 | 8 | 266±4  | 279±5  | 425±4  | 38.27 |
| 4 | 3 | 3 | 224±2  | 237±3  | 363±4  | 43.97 |
| 4 | 4 | 2 | 223±4  | 237±5  | 370±8  | 39.14 |
| 4 | 6 | 0 | 196±6  | 204±9  | 326±12 | 52.8  |
| 8 | 1 | 1 | 235±3  | 251±3  | 417±7  | 35.33 |
| 9 | 1 | 0 | 327±5  | 347±3  | 534±0  | 52    |
| 0 | 1 | 9 | 300±2  | 433±5  | 700±5  | 49.96 |
| 1 | 0 | 9 | 204±8  | 213±7  | 345±8  | 57.3  |
| 1 | 8 | 1 | 241±3  | 248±3  | 362±3  | 38.22 |
| 2 | 2 | 6 | 233±3  | 239±2  | 350±3  | 39.92 |
| 2 | 4 | 4 | 201±5  | 209±5  | 319±5  | 49.86 |
| 2 | 6 | 2 | 221±3  | 228±3  | 338±4  | 35.95 |
| 4 | 2 | 4 | 239±3  | 246±3  | 384±5  | 36.65 |
| 6 | 2 | 2 | 189±4  | 204±2  | 342±3  | 47.36 |
| 6 | 4 | 0 | 233±3  | 245±3  | 419±5  | 33    |
| 9 | 1 | 0 | 221±2  | 231±4  | 350±5  | 43.39 |
| 6 | 3 | 1 | 229±8  | 239±10 | 356±12 | 49.58 |
| 1 | 6 | 3 | 221±8  | 226±9  | 361±8  | 44.88 |
| 3 | 6 | 1 | 263±3  | 274±3  | 400±5  | 44.38 |
| 1 | 3 | 6 | 247±17 | 266±21 | 449±7  | 33.14 |
| 6 | 1 | 3 | 249±10 | 263±9  | 402±15 | 33.42 |
| 3 | 1 | 6 | 283±6  | 297±3  | 434±6  | 51.57 |
| 0 | 3 | 7 | 191±3  | 209±1  | 354±2  | 50.71 |
| 3 | 7 | 0 | 212±5  | 230±3  | 407±18 | 42.58 |
| 7 | 3 | 0 | 260±8  | 283±1  | 450±3  | 39.57 |
| 7 | 0 | 3 | 249±2  | 255±1  | 366±6  | 36.92 |

**Table S2.** Summary of the stoichiometries study on the electrochemical properties for the selected combinatorial catalysis system:  $\text{Fe}_x\text{Co}_y\text{La}_z$  (oxy)hydroxide aerogel.



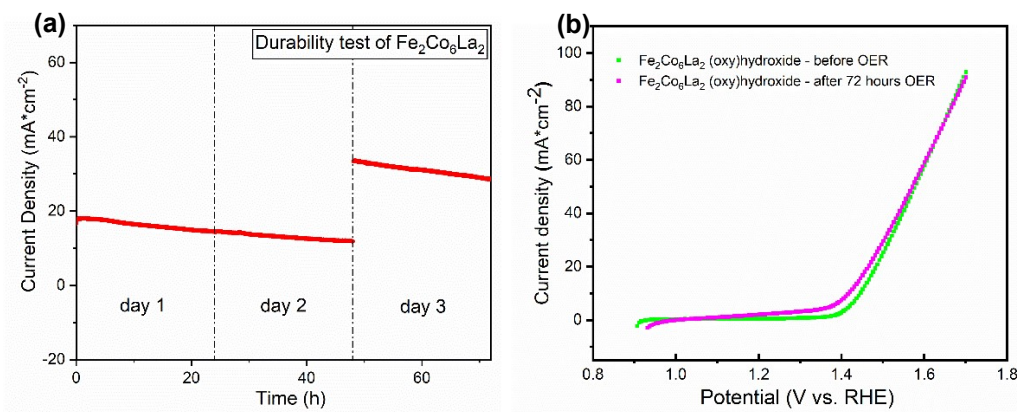

**Figure S4.** (a) Durability test of  $\text{Fe}_2\text{Co}_6\text{La}_2$ -based amorphous aerogel sample at current densities of 20  $\text{mA}\cdot\text{cm}^{-2}$  and 30  $\text{mA}\cdot\text{cm}^{-2}$  for 72 hour; (b) linear sweep voltammetries before and after 72 hours' stability test.

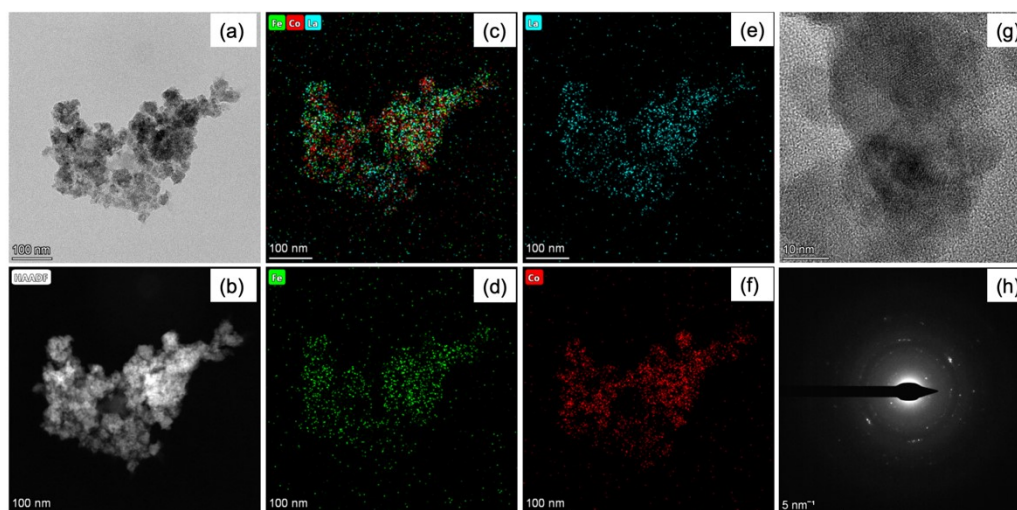

**Figure S5.** Characterization of  $\text{Fe}_2\text{Co}_6\text{La}_2$  (oxy)hydroxide aerogels after OER (a,b) TEM and HAADF images; (c, d, e and f) EDS mapping; (g) HRTEM; (h) the SAED.

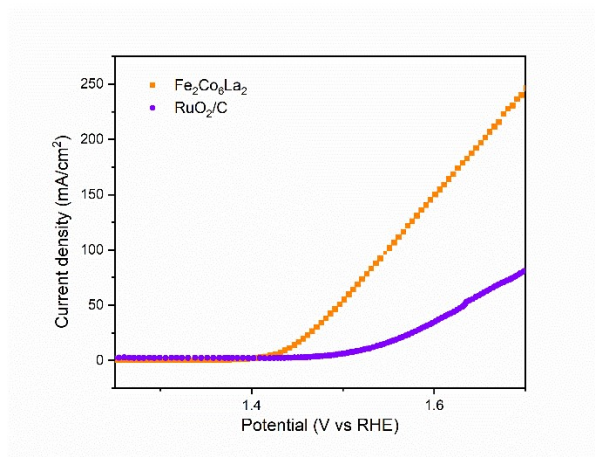

**Figure S6.** Electrocatalytic properties and Mass Productivity of aerogels with selected compositions and commercial catalysts. (LSV plot without iR compensation)

**Notes:** Mass activity is calculated by:

$$\text{Mass activity} = \frac{\text{Current at at } 1.67V \text{ (RHE) (mA)}}{\text{Metal loading on GCE (mg)}} = \frac{\text{Current density at } 1.67V \text{ (RHE) mA cm}^2 * 0.0707 \text{ cm}^2}{\text{Metal loading on GCE (mg)}}$$

Metal loading of catalysis was measured by the ICP-OES, Fe<sub>20</sub>Co<sub>60</sub>La<sub>20</sub> (oxy)hydroxides-gel, which showed a similar value around 60 wt%. Metal loading on GCE (mg) = 60 wt% \* 5 mg \* (5 ul / 1100 ul). The mass loading of RuO<sub>2</sub> catalyst is 0.025 mg cm<sup>-2</sup>, which were provided by previous works,<sup>28</sup> and have been verified.

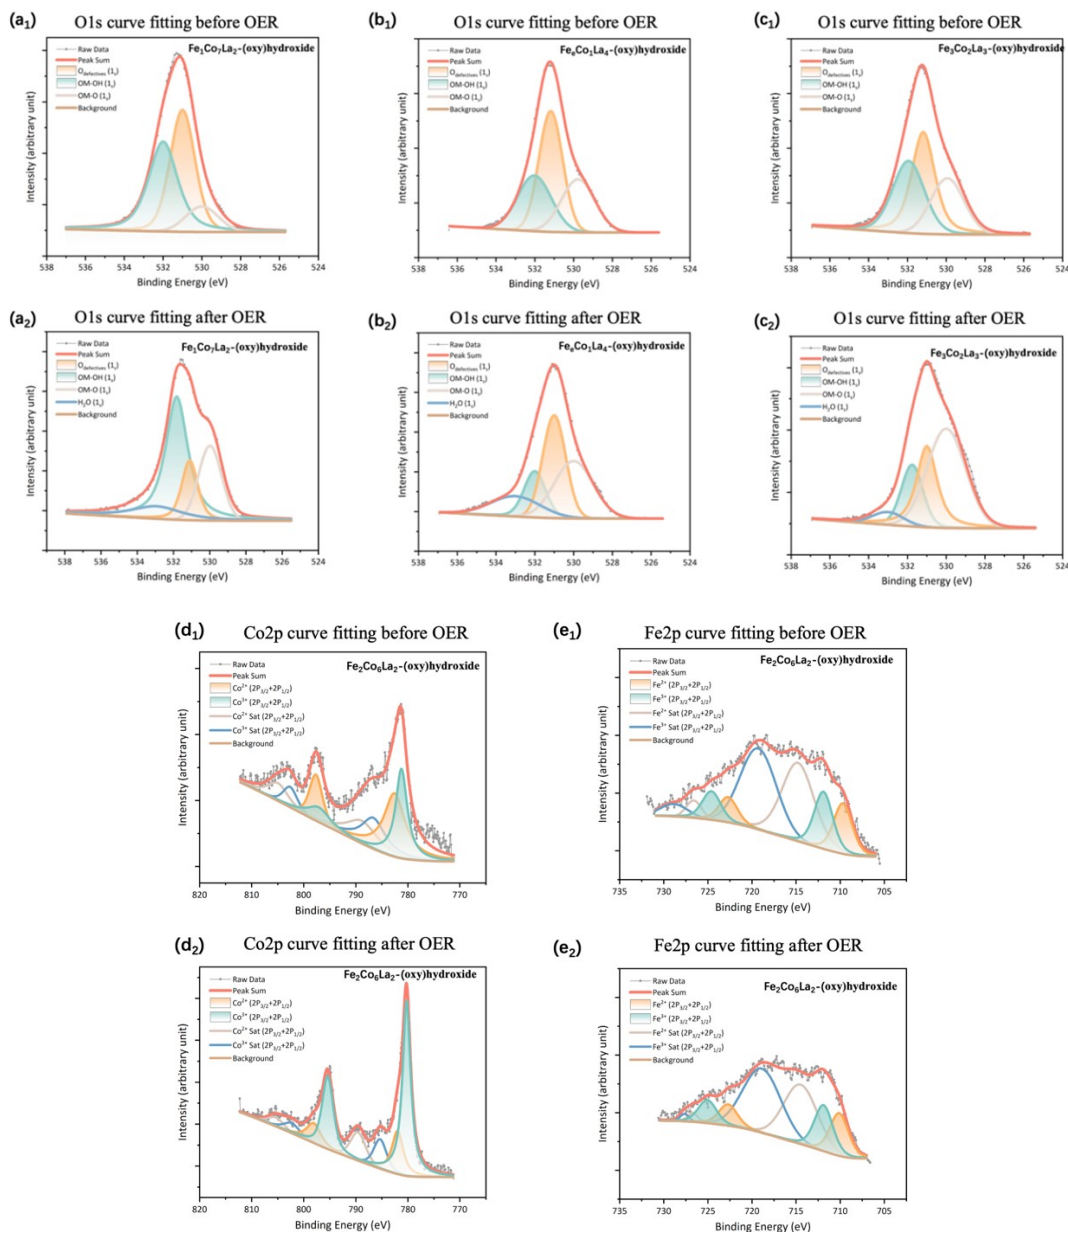

**Figure S7.** A few examples of X-ray photoelectron spectroscopy studies on selected aerogels. (a<sub>1-2</sub>) The XPS high-resolution spectrum of O 1s showed four peaks at around 530 eV, 531 eV, 532 eV and 534 eV which can be assigned to metal oxide ( $\text{O}_{\text{M-O}}$ ), defective oxygen sites ( $\text{O}_{\text{Defective}}$ ), hydroxide ( $\text{O}_{\text{M-OH}}$ ), and adsorbed  $\text{H}_2\text{O}$  ( $\text{H}_2\text{O}_{\text{adsorbed}}$ ) respectively.  $\text{Fe}_x\text{Co}_y\text{La}_z$  aerogel are examined to be mostly consisted with (oxy)hydroxide ( $\text{O}_{\text{Defective}}$  and  $\text{O}_{\text{M-OH}}$ ), after OER the content of metal oxide ( $\text{O}_{\text{M-O}}$ ) increase.<sup>2-6</sup> The XPS high-resolution spectrum of Co 2p showed peaks at: ca. 782.4 eV, 798 eV are assigned to  $\text{Co}^{2+}$  in Co  $2p_{3/2}$  and Co  $2p_{1/2}$ ; ca. 780.5 eV, 796 eV are assigned to  $\text{Co}^{3+}$  in Co  $2p_{3/2}$  and Co  $2p_{1/2}$ ; 789 eV and 805 eV are assigned to  $\text{Co}^{2+}$  satellite peaks;

786 eV and 802 eV are assigned to  $\text{Co}^{3+}$  satellite peaks.<sup>7-9</sup> The peaks located at ca.709.7 eV, 723.4 eV are assigned to  $\text{Fe}^{2+}$  in Fe 2p<sub>3/2</sub> and Fe 2p<sub>1/2</sub>; ca.709.7 eV, 723.4 eV are assigned to  $\text{Fe}^{3+}$  in Fe 2p<sub>3/2</sub> and Fe 2p<sub>1/2</sub>; 716 eV and 727 eV are assigned to  $\text{Fe}^{2+}$  satellite peaks, and 718 eV and 729 eV are assigned to  $\text{Fe}^{3+}$  satellite peaks.<sup>10-12</sup>

**(a) XPS analysis of O 1s before 100 times of cyclic voltammetry**

| Fe <sub>x</sub> Co <sub>y</sub> La <sub>z</sub> | O <sup>2-</sup> |       | O <sub>vac</sub> |       | O <sub>OH-</sub> |       | O <sub>H2O</sub> |      | O <sup>2-</sup><br>(%) | O <sub>vac</sub><br>(%) | O <sub>OH-</sub><br>(%) |
|-------------------------------------------------|-----------------|-------|------------------|-------|------------------|-------|------------------|------|------------------------|-------------------------|-------------------------|
|                                                 | B.E. (eV)       | area  | B.E. (eV)        | area  | B.E. (eV)        | area  | B.E. (eV)        | area |                        |                         |                         |
| 172                                             | 530.0           | 10394 | 531.0            | 41930 | 532.0            | 41642 | -                | -    | 0.11                   | 0.45                    | 0.44                    |
| 271                                             | 530.0           | 37966 | 531.0            | 34745 | 532.0            | 15730 | -                | -    | 0.43                   | 0.39                    | 0.18                    |
| 280                                             | 530.0           | 31536 | 531.2            | 24938 | 531.9            | 34829 | -                | -    | 0.35                   | 0.27                    | 0.38                    |
| 325                                             | 530.0           | 23744 | 531.0            | 34119 | 532.0            | 12201 | -                | -    | 0.34                   | 0.49                    | 0.17                    |
| 415                                             | 530.0           | 41393 | 531.0            | 26439 | 532.0            | 16971 | -                | -    | 0.49                   | 0.31                    | 0.20                    |
| 433                                             | 530.0           | 34284 | 531.0            | 34356 | 532.0            | 17803 | -                | -    | 0.40                   | 0.40                    | 0.21                    |
| 505                                             | 530.0           | 22004 | 531.0            | 25091 | 532.0            | 19267 | -                | -    | 0.33                   | 0.38                    | 0.29                    |
| 523                                             | 530.0           | 44577 | 531.0            | 24925 | 532.0            | 13380 | -                | -    | 0.54                   | 0.30                    | 0.16                    |
| 532                                             | 530.0           | 40337 | 531.0            | 36870 | 532.0            | 17318 | -                | -    | 0.43                   | 0.39                    | 0.18                    |
| 631                                             | 530.0           | 34329 | 531.0            | 29991 | 532.0            | 17283 | -                | -    | 0.42                   | 0.37                    | 0.21                    |
| 712                                             | 530.0           | 31375 | 531.0            | 36582 | 532.0            | 22357 | -                | -    | 0.35                   | 0.41                    | 0.25                    |
| 721                                             | 530.0           | 38273 | 531.0            | 39604 | 532.0            | 17385 | -                | -    | 0.40                   | 0.42                    | 0.18                    |
| 224                                             | 530.0           | 21342 | 531.0            | 37723 | 532.0            | 19670 | -                | -    | 0.27                   | 0.48                    | 0.25                    |
| 314                                             | 530.0           | 21067 | 531.0            | 33875 | 532.0            | 22288 | -                | -    | 0.27                   | 0.44                    | 0.29                    |
| 323                                             | 530.0           | 22148 | 531.0            | 34905 | 532.0            | 29061 | -                | -    | 0.26                   | 0.41                    | 0.34                    |
| 208                                             | 530.2           | 4806  | 532.0            | 15353 | 532.9            | 8910  | -                | -    | 0.17                   | 0.53                    | 0.31                    |
| 262                                             | 530.4           | 4554  | 531.7            | 27771 | 532.7            | 20365 | -                | -    | 0.09                   | 0.53                    | 0.39                    |
| 316                                             | 530.0           | 3992  | 531.3            | 56016 | 532.1            | 42327 | -                | -    | 0.04                   | 0.55                    | 0.41                    |
| 424                                             | 530.5           | 4802  | 532.0            | 38843 | 532.9            | 27259 | -                | -    | 0.07                   | 0.55                    | 0.38                    |
| 613                                             | 529.6           | 26792 | 530.9            | 47230 | 531.8            | 23459 | -                | -    | 0.27                   | 0.48                    | 0.24                    |
| 640                                             | 530.1           | 9308  | 531.7            | 21538 | 532.7            | 11008 | -                | -    | 0.22                   | 0.51                    | 0.26                    |
| 910                                             | 530.4           | 44738 | 531.1            | 52402 | 532.0            | 15585 | -                | -    | 0.40                   | 0.46                    | 0.14                    |

**(b) XPS analysis of O 1s after 100 times of cyclic voltammetry**

| Fe <sub>x</sub> Co <sub>y</sub> La <sub>z</sub> | O <sup>2-</sup> |       | O <sub>vac</sub> |       | O <sub>OH-</sub> |       | O <sub>H2O</sub> |       | O <sup>2-</sup><br>(%) | O <sub>vac</sub><br>(%) | O <sub>OH-</sub><br>(%) | O <sub>H2O</sub><br>(%) |
|-------------------------------------------------|-----------------|-------|------------------|-------|------------------|-------|------------------|-------|------------------------|-------------------------|-------------------------|-------------------------|
|                                                 | B.E. (eV)       | area  | B.E. (eV)        | area  | B.E. (eV)        | area  | B.E. (eV)        | area  |                        |                         |                         |                         |
| 172                                             | 530.0           | 15024 | 531.0            | 10225 | 532.0            | 33210 | 533.0            | 7850  | 0.23                   | 0.15                    | 0.50                    | 0.12                    |
| 271                                             | 530.0           | 16921 | 531.0            | 21056 | 532.0            | 12811 | 533.0            | 12165 | 0.27                   | 0.33                    | 0.20                    | 0.19                    |
| 280                                             | 530.0           | 10551 | 531.0            | 12031 | 532.0            | 18590 | 533.0            | 11248 | 0.20                   | 0.23                    | 0.35                    | 0.21                    |
| 325                                             | 530.0           | 20590 | 531.0            | 29557 | 532.0            | 15495 | 533.0            | 6823  | 0.28                   | 0.41                    | 0.21                    | 0.09                    |
| 415                                             | 530.0           | 37736 | 531.0            | 17471 | 532.0            | 8615  | 533.0            | 4192  | 0.55                   | 0.26                    | 0.13                    | 0.06                    |
| 433                                             | 530.0           | 38121 | 531.0            | 19119 | 532.0            | 8340  | 533.0            | 5080  | 0.54                   | 0.27                    | 0.12                    | 0.07                    |
| 505                                             | 530.0           | 51757 | 531.0            | 19248 | 532.0            | 8990  | 533.0            | 6527  | 0.60                   | 0.22                    | 0.10                    | 0.08                    |
| 523                                             | 530.0           | 29619 | 531.0            | 19651 | 532.0            | 10898 | 533.0            | 10774 | 0.42                   | 0.28                    | 0.15                    | 0.15                    |
| 532                                             | 530.0           | 16452 | 531.0            | 17419 | 532.0            | 6409  | 533.0            | 6111  | 0.35                   | 0.38                    | 0.14                    | 0.13                    |
| 631                                             | 530.0           | 19450 | 531.0            | 14463 | 532.0            | 16667 | 533.0            | 6639  | 0.34                   | 0.25                    | 0.29                    | 0.12                    |
| 712                                             | 530.0           | 16809 | 531.0            | 14596 | 532.0            | 8388  | 533.0            | 7945  | 0.35                   | 0.31                    | 0.18                    | 0.17                    |

|     |       |       |       |       |       |       |       |      |      |      |      |      |
|-----|-------|-------|-------|-------|-------|-------|-------|------|------|------|------|------|
| 721 | 530.0 | 13801 | 531.0 | 10610 | 532.0 | 9394  | 533.0 | 6319 | 0.34 | 0.26 | 0.23 | 0.16 |
| 224 | 530.0 | 19364 | 531.0 | 22013 | 532.0 | 9944  | 533.0 | 6725 | 0.33 | 0.38 | 0.17 | 0.12 |
| 314 | 530.0 | 18110 | 531.0 | 19223 | 532.0 | 8680  | 533.0 | 8213 | 0.33 | 0.35 | 0.16 | 0.15 |
| 323 | 530.0 | 39544 | 531.0 | 23276 | 532.0 | 14738 | 533.0 | 4142 | 0.48 | 0.28 | 0.18 | 0.05 |
| 208 | 529.7 | 8244  | 531.3 | 18492 | 532.3 | 11018 | 535.1 | 9060 | 0.18 | 0.40 | 0.24 | 0.19 |
| 262 | 530.2 | 17378 | 531.5 | 31313 | 532.4 | 14103 | 535.1 | 6737 | 0.25 | 0.45 | 0.20 | 0.10 |
| 316 | 530.4 | 39718 | 531.2 | 45134 | 532.2 | 18577 | 535.0 | 563  | 0.38 | 0.43 | 0.18 | 0.01 |
| 424 | 530.1 | 19122 | 531.5 | 46516 | 532.5 | 28292 | 535.3 | 5895 | 0.19 | 0.47 | 0.28 | 0.06 |
| 613 | 529.6 | 40251 | 530.8 | 38258 | 531.8 | 19321 | 533.0 | 2951 | 0.40 | 0.38 | 0.19 | 0.03 |
| 640 | 529.7 | 13186 | 531.2 | 27809 | 532.2 | 10839 | 535.0 | 6396 | 0.23 | 0.48 | 0.19 | 0.11 |
| 910 | 530.0 | 32273 | 531.3 | 48418 | 532.2 | 18565 | 538.3 | 6113 | 0.31 | 0.46 | 0.18 | 0.06 |

**(c) XPS analysis of Co 2p before 100 times of cyclic voltammetry**

| Fe <sub>x</sub> Co <sub>y</sub> La <sub>z</sub> | Co <sup>2+</sup> (2p <sub>3/2</sub> ) |          | Co <sup>2+</sup> (2p <sub>1/2</sub> ) |          | Co <sup>3+</sup> (2p <sub>3/2</sub> ) |          | Co <sup>3+</sup> (2p <sub>3/2</sub> ) |          | Co <sup>2+</sup> (%) |
|-------------------------------------------------|---------------------------------------|----------|---------------------------------------|----------|---------------------------------------|----------|---------------------------------------|----------|----------------------|
|                                                 | B.E. (eV)                             | area     |                      |
| 172                                             | 782.19                                | 41950.21 | 797.72                                | 21781.13 | 780.69                                | 29541.21 | 796.44                                | 18940.72 | 0.57                 |
| 271                                             | 782.37                                | 48888.59 | 797.55                                | 46656.01 | 780.48                                | 47575.68 | 796.24                                | 28128.56 | 0.56                 |
| 280                                             | 782.25                                | 56793.39 | 797.71                                | 27717.28 | 780.67                                | 36534.64 | 796.35                                | 28849.60 | 0.56                 |
| 325                                             | 782.39                                | 18895.24 | 797.94                                | 5454.95  | 780.62                                | 20269.11 | 796.08                                | 9493.22  | 0.45                 |
| 415                                             | 782.42                                | 13165.94 | 798.30                                | 2311.38  | 780.47                                | 16153.54 | 795.73                                | 7905.51  | 0.39                 |
| 433                                             | 782.4                                 | 16261.18 | 798                                   | 7115.18  | 780.5                                 | 19106    | 796                                   | 9941.78  | 0.45                 |
| 523                                             | 782.64                                | 14849.08 | 797.40                                | 5074.48  | 780.20                                | 16602.96 | 795.71                                | 9156.07  | 0.44                 |
| 532                                             | 782.49                                | 24075.85 | 797.34                                | 9860.97  | 780.42                                | 22848.08 | 795.75                                | 14068.94 | 0.48                 |
| 631                                             | 782.49                                | 26682.25 | 797.53                                | 10167.39 | 780.54                                | 26503.67 | 796.02                                | 16622.94 | 0.46                 |
| 712                                             | 782.27                                | 30653.26 | 797.68                                | 13387.74 | 780.62                                | 24793.70 | 796.31                                | 18978.72 | 0.50                 |
| 721                                             | 782.40                                | 18219.13 | 798.00                                | 4995.02  | 780.50                                | 19788.88 | 796.00                                | 12082.41 | 0.42                 |
| 224                                             | 782.45                                | 19766.67 | 797.62                                | 10106.80 | 780.50                                | 20422.86 | 796.24                                | 11528.08 | 0.48                 |
| 314                                             | 782.40                                | 14719.70 | 798.00                                | 6545.29  | 780.50                                | 18079.90 | 796.00                                | 8287.10  | 0.45                 |
| 323                                             | 782.34                                | 18267.80 | 797.81                                | 5881.46  | 780.80                                | 13670.38 | 796.48                                | 6912.43  | 0.54                 |
| 262                                             | 782.56                                | 14858.37 | 797.66                                | 5451.88  | 781.24                                | 11408.62 | 797.12                                | 3688.48  | 0.57                 |
| 316                                             | 782.40                                | 4151.77  | 798.00                                | 964.47   | 780.50                                | 7483.23  | 796.00                                | 2961.36  | 0.33                 |
| 424                                             | 782.40                                | 4851.63  | 796.83                                | 2212.33  | 780.50                                | 5837.61  | 796.00                                | 2251.40  | 0.47                 |
| 613                                             | 782.11                                | 8958     | 796.27                                | 2172.99  | 779.9                                 | 12654.8  | 794.56                                | 3989.39  | 0.40                 |
| 640                                             | 782.53                                | 10058.81 | 798.06                                | 5313.52  | 780.80                                | 7648.05  | 796.20                                | 2905.20  | 0.59                 |
| 910                                             | 782.48                                | 71539.63 | 797.62                                | 32073.13 | 780.43                                | 76519.38 | 796.19                                | 39876.89 | 0.47                 |

**(d) XPS analysis of Co 2p after 100 times of cyclic voltammetry**

| Fe <sub>x</sub> Co <sub>y</sub> La <sub>z</sub> | Co <sup>2+</sup> (2p <sub>3/2</sub> ) |          | Co <sup>2+</sup> (2p <sub>1/2</sub> ) |          | Co <sup>3+</sup> (2p <sub>3/2</sub> ) |          | Co <sup>3+</sup> (2p <sub>3/2</sub> ) |          | Co <sup>2+</sup> (%) |
|-------------------------------------------------|---------------------------------------|----------|---------------------------------------|----------|---------------------------------------|----------|---------------------------------------|----------|----------------------|
|                                                 | B.E. (eV)                             | area     |                      |
| 172                                             | 782.17                                | 21089.03 | 798.15                                | 9331.73  | 780.51                                | 33615.65 | 795.73                                | 23689.09 | 0.35                 |
| 271                                             | 782.21                                | 31448.88 | 798.14                                | 14677.14 | 780.50                                | 41611.87 | 795.75                                | 33116.54 | 0.38                 |
| 280                                             | 782.10                                | 21811.80 | 798.00                                | 10139.99 | 780.62                                | 21740.63 | 795.93                                | 17724.23 | 0.45                 |
| 325                                             | 782.4                                 | 12553.3  | 796.95                                | 6358.82  | 780.5                                 | 19601.44 | 795.43                                | 8478.81  | 0.40                 |

|     |        |          |        |          |        |          |        |          |      |
|-----|--------|----------|--------|----------|--------|----------|--------|----------|------|
| 415 | 782.68 | 5609.51  | 797.31 | 875.40   | 780.16 | 8690.04  | 795.77 | 4844.97  | 0.32 |
| 433 | 782.90 | 16268.67 | 798.21 | 9749.15  | 780.12 | 43888.83 | 795.24 | 26346.38 | 0.27 |
| 523 | 782.59 | 8268.23  | 798.25 | 3180.74  | 780.25 | 16126.38 | 795.51 | 9261.79  | 0.31 |
| 532 | 782.75 | 12682.60 | 797.60 | 8033.57  | 780.28 | 30395.71 | 795.32 | 16473.07 | 0.31 |
| 631 | 782.27 | 19079.51 | 797.66 | 7062.04  | 780.48 | 26706.93 | 795.67 | 17081.28 | 0.37 |
| 712 | 782.40 | 6780.34  | 798.47 | 2356.24  | 780.44 | 7505.74  | 795.61 | 5271.40  | 0.42 |
| 721 | 782.58 | 5750.77  | 798.13 | 2819.51  | 780.26 | 11766.35 | 795.41 | 7223.38  | 0.31 |
| 224 | 781.55 | 7281.10  | 798.71 | 3401.31  | 780.54 | 16732.98 | 795.63 | 9073.35  | 0.29 |
| 314 | 782.40 | 4438.36  | 796.77 | 2646.25  | 780.50 | 9801.56  | 795.20 | 3875.91  | 0.34 |
| 323 | 782.54 | 14919.23 | 797.75 | 5968.61  | 780.24 | 32906.90 | 795.31 | 17524.31 | 0.29 |
| 262 | 781.97 | 7926.95  | 798.07 | 4494.24  | 780.26 | 24590.68 | 795.40 | 12012.48 | 0.25 |
| 316 | 782.40 | 2569.23  | 798.00 | 1499.68  | 780.50 | 11800.68 | 796.00 | 4340.16  | 0.20 |
| 424 | 782.73 | 12553.52 | 798.19 | 8025.64  | 780.24 | 36427.63 | 795.37 | 21893.95 | 0.26 |
| 613 | 782.76 | 9257.32  | 797.41 | 2184.35  | 780.03 | 15374.86 | 795.27 | 8120.04  | 0.33 |
| 640 | 782.35 | 11063.78 | 798.36 | 5282.65  | 780.12 | 20188.60 | 795.22 | 14651.04 | 0.32 |
| 910 | 782.28 | 43676.25 | 798.28 | 12388.99 | 780.42 | 74190.22 | 795.60 | 54232.19 | 0.30 |

**(e) XPS analysis of Fe 2p before 100 times of cyclic voltammetry**

| Fe <sub>x</sub> Co <sub>y</sub> La <sub>z</sub> | Fe <sup>2+</sup> (2p <sub>3/2</sub> ) |          | Fe <sup>2+</sup> (2p <sub>1/2</sub> ) |          | Fe <sup>3+</sup> (2p <sub>3/2</sub> ) |          | Fe <sup>3+</sup> (2p <sub>1/2</sub> ) |          | Fe <sup>2+</sup> (%) |
|-------------------------------------------------|---------------------------------------|----------|---------------------------------------|----------|---------------------------------------|----------|---------------------------------------|----------|----------------------|
|                                                 | B.E. (eV)                             | area     |                      |
| 172                                             | 710.18                                | 7443.93  | 723.06                                | 2058.69  | 712.00                                | 9446.49  | 724.93                                | 3513.88  | 0.42                 |
| 271                                             | 709.82                                | 10329.26 | 723.00                                | 3965.48  | 711.55                                | 11053.39 | 724.41                                | 4137.83  | 0.48                 |
| 280                                             | 710.25                                | 14068.43 | 723.05                                | 6334.22  | 711.81                                | 18874.91 | 724.83                                | 8224.71  | 0.43                 |
| 325                                             | 782.39                                | 18895.24 | 797.94                                | 5454.95  | 780.62                                | 20269.11 | 796.08                                | 9493.22  | 0.45                 |
| 415                                             | 782.42                                | 13165.94 | 798.30                                | 2311.38  | 780.47                                | 16153.54 | 795.73                                | 7905.51  | 0.39                 |
| 433                                             | 782.40                                | 18726.38 | 797.51                                | 9746.79  | 780.43                                | 19243.70 | 796.05                                | 12309.32 | 0.47                 |
| 505                                             | 710.34                                | 11366.01 | 723.41                                | 5160.17  | 711.78                                | 14063.40 | 724.88                                | 6595.73  | 0.44                 |
| 523                                             | 709.87                                | 15061.45 | 723.16                                | 7154.19  | 711.54                                | 14623.42 | 724.81                                | 6907.87  | 0.51                 |
| 532                                             | 709.98                                | 15119.55 | 723.14                                | 6702.75  | 711.58                                | 19166.69 | 724.71                                | 8795.84  | 0.44                 |
| 631                                             | 710.04                                | 13438.39 | 723.18                                | 6341.50  | 711.48                                | 21052.19 | 724.78                                | 10526.09 | 0.39                 |
| 712                                             | 710.12                                | 14251.40 | 723.21                                | 6413.13  | 711.65                                | 19359.16 | 724.80                                | 7926.04  | 0.43                 |
| 721                                             | 710.04                                | 27834.72 | 723.16                                | 12694.43 | 711.74                                | 21629.13 | 724.77                                | 9317.10  | 0.57                 |
| 224                                             | 710.11                                | 7038.58  | 723.00                                | 3519.29  | 711.74                                | 8805.60  | 724.70                                | 4402.80  | 0.44                 |
| 314                                             | 710.00                                | 8097.84  | 723.28                                | 3553.89  | 711.44                                | 8674.09  | 724.60                                | 3820.29  | 0.48                 |
| 323                                             | 710.11                                | 9121.14  | 723.18                                | 3874.66  | 711.59                                | 14254.69 | 724.80                                | 7040.99  | 0.38                 |
| 208                                             | 709.66                                | 5648.96  | 722.50                                | 3067.44  | 711.50                                | 6134.89  | 724.49                                | 3067.44  | 0.49                 |
| 262                                             | 709.69                                | 5327.58  | 722.70                                | 2663.79  | 711.89                                | 6022.56  | 724.59                                | 3011.28  | 0.47                 |
| 316                                             | 710.00                                | 2830.89  | 722.70                                | 1415.44  | 711.82                                | 4801.77  | 725.00                                | 2400.88  | 0.37                 |
| 424                                             | 711.02                                | 5666.37  | 722.70                                | 2833.19  | 712.62                                | 3102.94  | 724.50                                | 1551.47  | 0.65                 |
| 613                                             | 709.70                                | 11846.42 | 723.24                                | 5618.60  | 711.22                                | 12174.99 | 724.92                                | 6186.61  | 0.49                 |
| 640                                             | 710.13                                | 7266.00  | 723.12                                | 2622.29  | 711.82                                | 9238.72  | 724.51                                | 3254.98  | 0.44                 |
| 910                                             | 710.69                                | 18030.22 | 721.38                                | 6011.54  | 712.54                                | 17988.49 | 724.27                                | 8994.24  | 0.47                 |

**(f) XPS analysis of Fe 2p after 100 times of cyclic voltammetry**

| Fe <sub>x</sub> Co <sub>y</sub> La <sub>z</sub> | Fe <sup>2+</sup> (2p3) |          | Fe <sup>2+</sup> (2p1) |         | Fe <sup>3+</sup> (2p3) |          | Fe <sup>3+</sup> (2p1) |         | Fe <sup>2+</sup> (%) |
|-------------------------------------------------|------------------------|----------|------------------------|---------|------------------------|----------|------------------------|---------|----------------------|
|                                                 | B.E. (eV)              | area     | B.E. (eV)              | area    | B.E. (eV)              | area     | B.E. (eV)              | area    |                      |
| 172                                             | 710.16                 | 1861.11  | 722.70                 | 739.85  | 711.15                 | 2472.92  | 724.50                 | 912.58  | 0.43                 |
| 271                                             | 709.93                 | 2808.84  | 723.00                 | 852.90  | 711.50                 | 4913.63  | 724.30                 | 1247.59 | 0.37                 |
| 280                                             | 710.37                 | 3052.79  | 722.96                 | 1013.75 | 711.50                 | 4945.51  | 724.50                 | 1900.93 | 0.37                 |
| 325                                             | 710.00                 | 4600.02  | 722.79                 | 2300.01 | 711.42                 | 7748.86  | 724.40                 | 3874.43 | 0.37                 |
| 415                                             | 709.67                 | 8016.01  | 723.07                 | 3426.49 | 711.08                 | 9231.36  | 724.25                 | 4262.12 | 0.46                 |
| 433                                             | 709.75                 | 5931.77  | 722.90                 | 2669.30 | 711.26                 | 6177.18  | 724.30                 | 2501.76 | 0.50                 |
| 505                                             | 709.90                 | 12002.90 | 723.12                 | 5401.31 | 711.17                 | 16045.36 | 724.48                 | 7220.41 | 0.43                 |
| 523                                             | 709.85                 | 6897.95  | 723.26                 | 3104.08 | 711.17                 | 8021.69  | 724.50                 | 3333.51 | 0.47                 |
| 532                                             | 709.72                 | 3249.63  | 722.90                 | 1299.85 | 711.46                 | 4887.47  | 724.40                 | 1954.99 | 0.40                 |
| 631                                             | 710.11                 | 6622.97  | 722.87                 | 3012.11 | 711.48                 | 7437.58  | 724.46                 | 3346.91 | 0.47                 |
| 712                                             | 709.93                 | 6244.42  | 723.38                 | 2584.29 | 711.35                 | 9007.96  | 724.74                 | 3550.70 | 0.41                 |
| 721                                             | 709.82                 | 5683.59  | 723.03                 | 1127.09 | 711.63                 | 6175.24  | 724.34                 | 1646.67 | 0.47                 |
| 224                                             | 709.88                 | 2677.64  | 722.91                 | 1071.06 | 711.37                 | 4034.02  | 724.40                 | 1815.31 | 0.39                 |
| 314                                             | 709.80                 | 2508.64  | 722.72                 | 1254.32 | 711.10                 | 3574.92  | 724.50                 | 1787.46 | 0.41                 |
| 323                                             | 709.73                 | 7011.29  | 722.97                 | 3211.17 | 711.16                 | 9956.00  | 724.45                 | 4490.61 | 0.41                 |
| 208                                             | 710.04                 | 8711.51  | 722.00                 | 3605.01 | 712.00                 | 7210.01  | 724.57                 | 3605.01 | 0.53                 |
| 262                                             | 710.11                 | 4506.37  | 722.70                 | 2253.19 | 711.88                 | 4856.16  | 725.05                 | 2406.60 | 0.48                 |
| 316                                             | 710.26                 | 5455.68  | 722.55                 | 1954.18 | 712.11                 | 4448.02  | 724.99                 | 2714.25 | 0.51                 |
| 424                                             | 710.18                 | 5478.86  | 722.70                 | 2739.43 | 711.88                 | 6871.96  | 724.90                 | 3435.98 | 0.44                 |
| 613                                             | 709.84                 | 15321.59 | 723.15                 | 7660.79 | 711.31                 | 18933.92 | 724.90                 | 9466.96 | 0.45                 |
| 640                                             | 710.05                 | 7158.83  | 723.00                 | 2033.78 | 711.73                 | 8169.09  | 724.40                 | 2730.73 | 0.46                 |
| 910                                             | 710.52                 | 11615.31 | 722.00                 | 6361.41 | 712.50                 | 14221.02 | 724.78                 | 5985.95 | 0.47                 |

**Table S3.** X-ray photoelectron spectroscopy studies on selected aerogels before and after OER. Peaks information for XPS high-resolution spectra after curve fitting: **(a-b)** O 1s, **(c-d)** Co 2p and **(e-f)** Fe 2p.



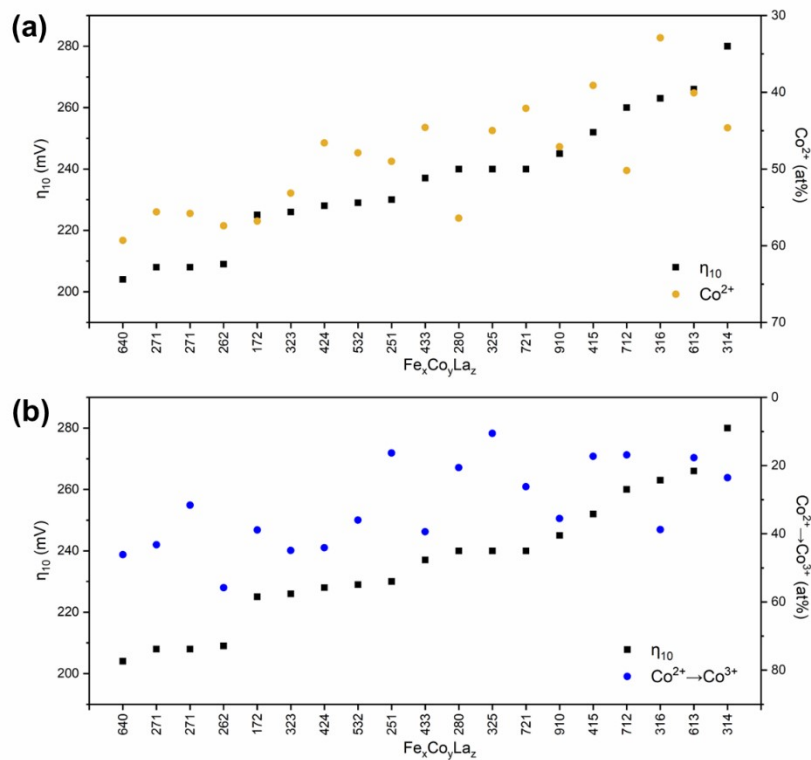

**Figure S8.** The demonstration of the corresponding relationship between **(a)** the ratio of  $\text{Co}^{2+}$  in  $(\text{Co}^{2+} + \text{Co}^{3+})$  before the OER reaction, **(b)** the conversion of  $\text{Co}^{2+}$  to  $\text{Co}^{3+}$  after the reaction within selected aerogel samples and their catalytic performance ( $\eta_{10}$ ).

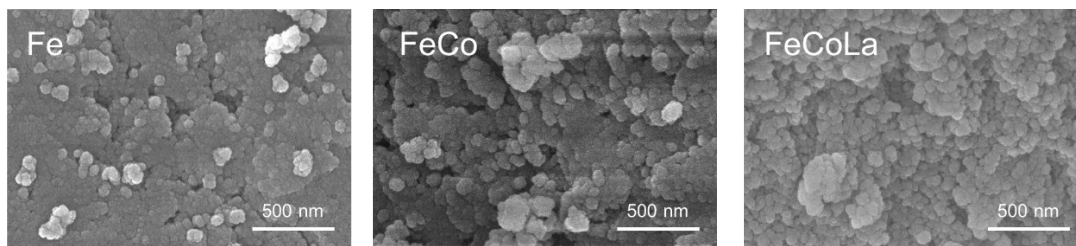

**Figure S9.** SEM images of binary aerogel and Ternary aerogels

|                                            | Bond | R( $\text{\AA}$ ) | CN   | R-factor | Sigma <sup>2</sup> | E <sub>0</sub> (eV) | $\Delta R$ |
|--------------------------------------------|------|-------------------|------|----------|--------------------|---------------------|------------|
| Fe <sub>3</sub> O <sub>2</sub> - aerogel   | Co-O | 2.03              | 5.7  | 0.007    | 0.01               | -2.29               | -0.54      |
|                                            | Fe-O | 1.97              | 5.9  | 0.005    | 0.01               | -1.06               | 0.037      |
| Fe <sub>3</sub> Co <sub>3</sub> La-aerogel | Co-O | 2.04              | 6    | 0.012    | 0.009              | -1.40               | -0.55      |
|                                            | Fe-O | 1.98              | 5.88 | 0.006    | 0.01               | -0.49               | 0.047      |

*R* is the bond length; *CN* is the coordination numbers; *sigma*<sup>2</sup> is the Debye-Waller factor.

**Table S4.** The fitting parameters of the Co and Fe k-edge EXAFS data

The Fourier Transform of the Co and Fe k-edge extended X-ray absorption fine structure (EXAFS) spectra of the Fe<sub>3</sub>O<sub>2</sub>-based aerogel and Fe<sub>3</sub>Co<sub>3</sub>La-based aerogel was carried out in Artemis (Version 0.9.26). The model of bulk Co, bulk Fe, CoOOH and FeOOH were used to calculate the simulated scattering paths. The fitted bond length (R), coordination numbers (CN), R-factors, sigma<sup>2</sup>, E<sub>0</sub> and ΔR are summarized in **Table S4**.

## References

- 1 K. Yang, P. Xu, Z. Lin, Y. Yang, P. Jiang, C. Wang, S. Liu, S. Gong, L. Hu and Q. Chen, *Small*, 2018, **14**, 1803009.
- 2 X. Bai, Y. Fan, C. Hou, T. Tang and J. Guan, *International Journal of Hydrogen Energy*, 2022, **47**, 16711–16718.
- 3 Z. Ye, C. Qin, G. Ma, X. Peng, T. Li, D. Li and Z. Jin, *ACS Applied Materials and Interfaces*, 2018, **10**, 39809–39818.
- 4 Y. Li, M. Lu, Y. Wu, Q. Ji, H. Xu, J. Gao, G. Qian and Q. Zhang, *Journal of Materials Chemistry A*, 2020, **8**, 18215–18219.
- 5 C. Dong, X. Yuan, X. Wang, X. Liu, W. Dong, R. Wang, Y. Duan and F. Huang, *Journal of Materials Chemistry A*, 2016, **4**, 11292–11298.
- 6 Y. Fu, L. Li, S. Ye, P. Yang, P. Liao, X. Ren, C. He, Q. Zhang and J. Liu, *Journal of Materials Chemistry A*, 2021, **9**, 453–462.
- 7 L. Tian, J. L. Zhu, L. Chen, B. An, Q. Q. Liu and K. L. Huang, *Journal of Nanoparticle Research*, 2011, **13**, 3483–3488.
- 8 J. Chen, H. Li, S. Chen, J. Fei, C. Liu, Z. Yu, K. Shin, Z. Liu, L. Song, G. Henkelman, L. Wei and Y. Chen, *Advanced Energy Materials*, 2021, **11**, 1–9.
- 9 F. T. Haase, A. Bergmann, T. E. Jones, J. Timoshenko, A. Herzog, H. S. Jeon, C. Rettenmaier and B. R. Cuenya, *Nature Energy*, 2022, **7**, 765–773.
- 10 N. S. McIntyre and D. G. Zetaruk, *Analytical Chemistry*, 1977, **49**, 1521–1529.
- 11 B. J. Tan, K. J. Klabunde and P. M. A. Sherwood, *Chemistry of Materials*, 1990, **2**, 186–191.
- 12 E. Chmielewská, W. Tylus, M. Drábik, J. Majzlan, J. Kravčák, C. Williams, M. Čaplovičová, and Čaplovič, *Microporous and Mesoporous Materials*, 2017, **248**, 222–233.
